# Supplementary material for: Synthesis and activation of pH-sensitive metal–organic framework Sr(BDC)∞ for oral drug delivery
Source: Royal Society of Chemistry journal article supplement (doi:10.1039/d3dt02822d), 2023-12-01
Supplement: d3dt02822d1.pdf [file d3dt02822d1.pdf]

**Synthesis and activation of pH-sensitive Metal-Organic Framework Sr(BDC) ∞  
for oral drug delivery**

Andrey Vodyashkin<sup>1,\*</sup>, Antonina Sergorodceva<sup>1</sup>, Parfait Kezimana<sup>1</sup>, Mariya Morozova<sup>1</sup>, Elena Nikolskaya<sup>2</sup>, Mariia Mollaeva<sup>2</sup>, Nikita Yabbarov<sup>2</sup>, Maria Sokol<sup>2</sup>, Margarita Chirkina<sup>2</sup>, Leonid Butusov<sup>1</sup>, Alexey Timofeev<sup>1,3</sup>

<sup>1</sup> Peoples' Friendship University of Russia (RUDN University), 117198, Moscow, Russia. \*Email: av.andrey2013@yandex.ru

<sup>2</sup> N.M. Emanuel Institute of biochemical physics of Russian academy of sciences, 119334, Moscow, Russia

<sup>3</sup> National Research Nuclear University MEPhI (Moscow Engineering Physics Institute), 115409, Moscow, Russia

## **S1. Materials**

N,N-Dimethylformamide (DMF) solvent (anhydrous, 99.8%) was purchased from Sigma- Aldrich Inc (USA); Strontium chloride hexahydrate (ACS reagent, 99%) was purchased from Sigma-Aldrich Inc (USA); Ethyl alcohol, Pure (200 proof, ACS reagent,  $\geq 99.5\%$ ) Sigma-Aldrich Inc (USA); Terephthalic acid, 98% manufacturer Acros Organics; MTT Formazan (1-(4,5-Dimethylthiazol-2-yl)-3,5-diphenylformazan, powder) Sigma-Aldrich Inc (USA); Dimethyl sulfoxide (for molecular biology,  $\geq 99.9\%$ ) Sigma-Aldrich Inc (USA); Doxorubicin- Teva (ATX code: L01DB01) Teva Pharmaceutical Industries, Ltd (Israel).

Ethylenediaminetetraacetic acid (EDTA) was purchased from Serva ( Germany), 3-(4,5-dimethyl-2-thiazolyl)-2,5-diphenyl-2H-tetrasolium bromide (MTT) (Sigma-Aldrich, USA); 96% ethanol (Chimmed, Moscow, Russia); Dulbecco's modified Eagle's medium (DMEM) (Gibco, USA); fetal bovine serum (FBS) (Gibco, USA); phosphate buffered saline (PBS) (PanEco, Russia); dimethyl sulfoxide (DMSO) (Amresco, USA); 0.02% EDTA and 0.05% trypsin solutions (Gibco, USA); gentamycin (PanEco, Russia), Annexin V-FITC/PI kit was purchased from Biologend (USA).

## S2. DOX encapsulation in SR(BDC)

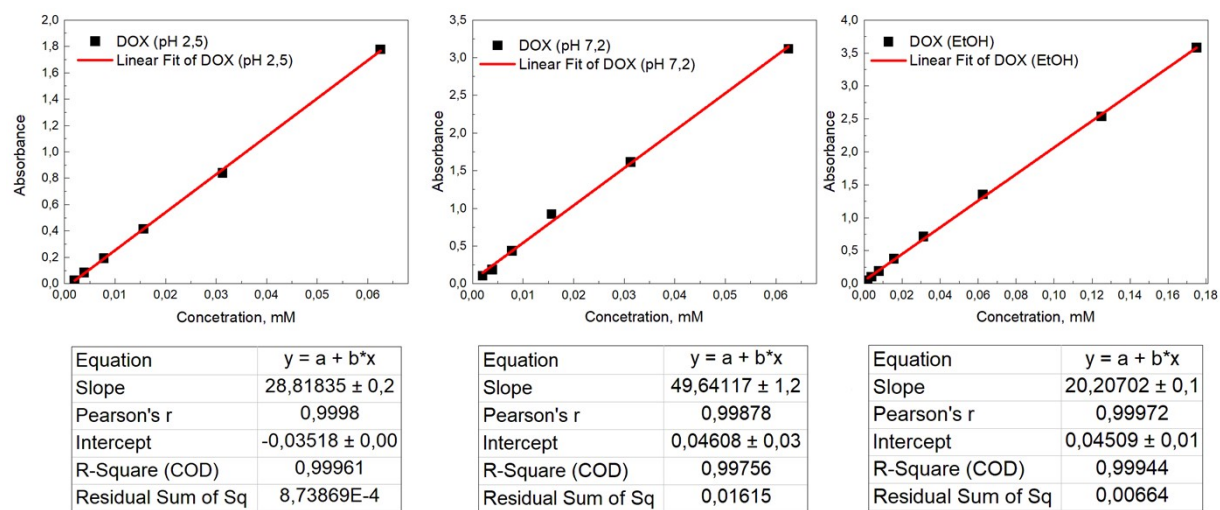

Figure S1. Calibration graph for the determination of doxorubicin in various media (gastric juice (pH - 2.5), intestinal fluid (pH - 7.2), and in ethanol)

### S3. Pore size

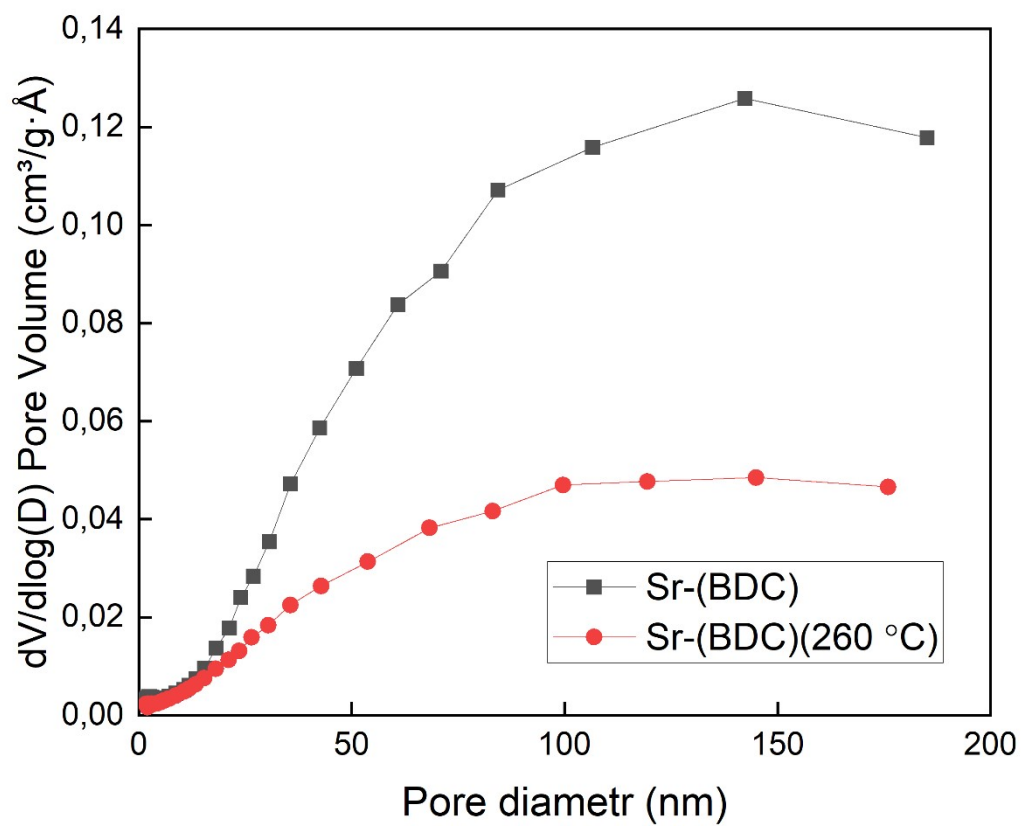

Figure S2. Pore size distribution of MOF Sr-(BDC), Sr-(BDC)(260 °C)
